# Supplementary material for: The effect of electrochemically active element species on the stability of the layered cathode–sulfide electrolyte interface
Source: Royal Society of Chemistry journal article supplement (doi:10.1039/d3nj01505j), 2023-01-01
Supplement: d3nj01505j1.pdf [file d3nj01505j1.pdf]

## Supporting Information

### Effect of electrochemically active element species on the stability of the layered cathode-sulfide electrolyte interface

Yiming Sun, Senhao Li, Kai Yang, Yue Ma, Hongzhou Zhang, Dawei Song, Yi Wang\*,  
Chunliang Li, Defa Wang\*, Lianqi Zhang\*

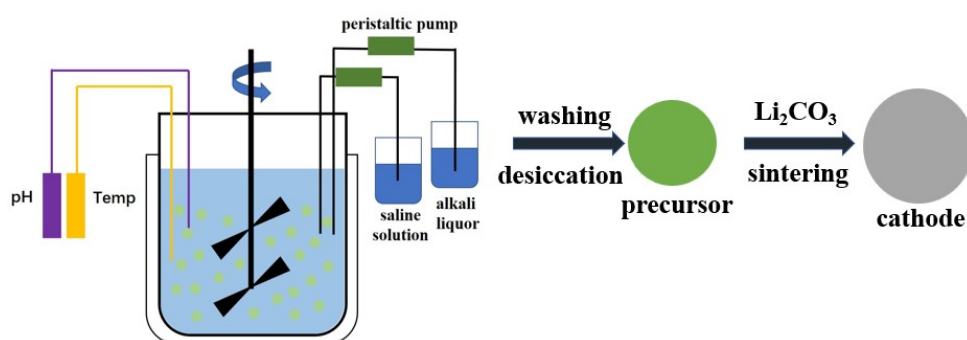

Fig. S1. Scheme of precursor and cathode material preparation.

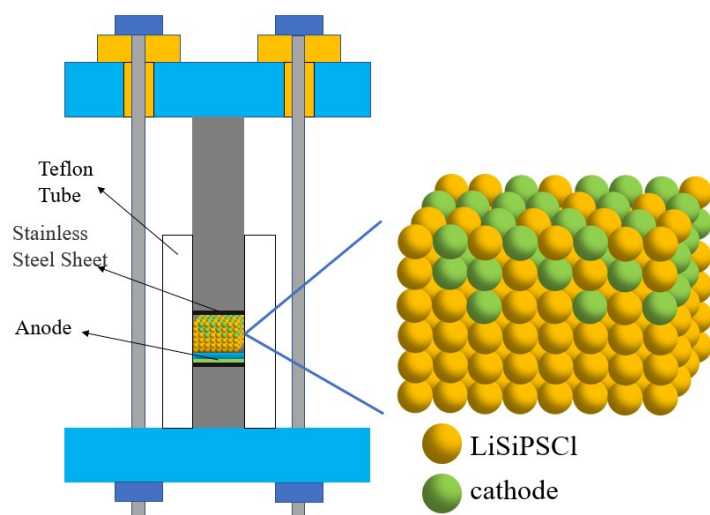

Fig. S2. Schematic diagram of assembled ASSLB.

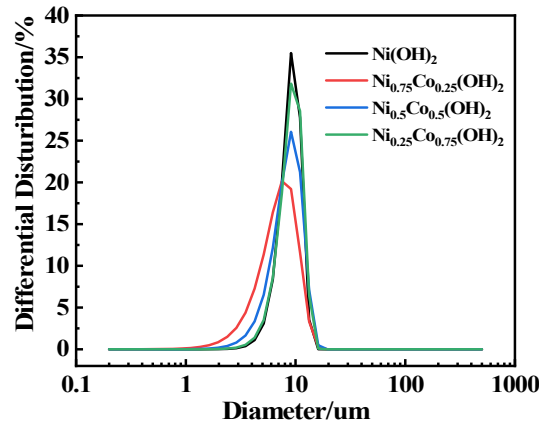

Fig. S3 Particle size distribution of the precursors.

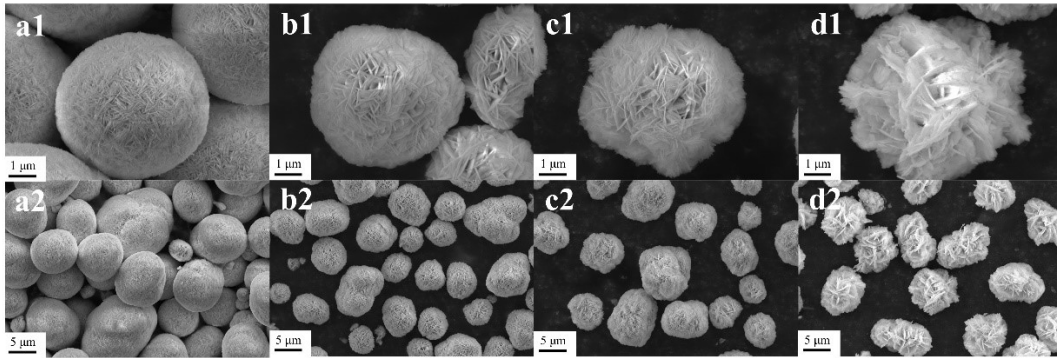

Fig. S4 SEM images of precursors of (a1-d2) LNO, N75, N50, and N25.

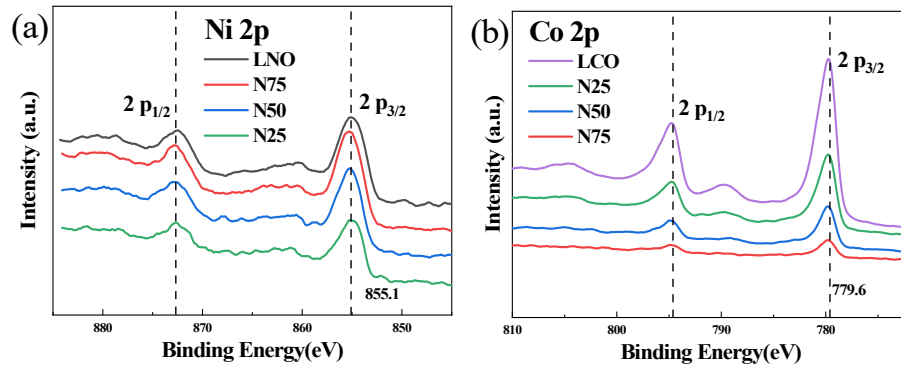

Fig. S5 X-ray photoelectron spectroscopy raw spectra of (a)Ni 2p and (b)Co 2p for cathode materials.

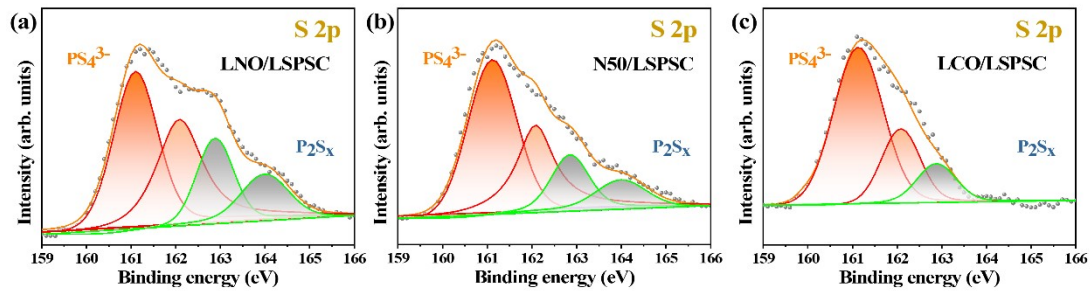

Fig. S6 XPS spectra of (a) LNO/LSPSC, (b) N50/LSPSC and (c) LCO/LSPSC mixture after 150h standing time.

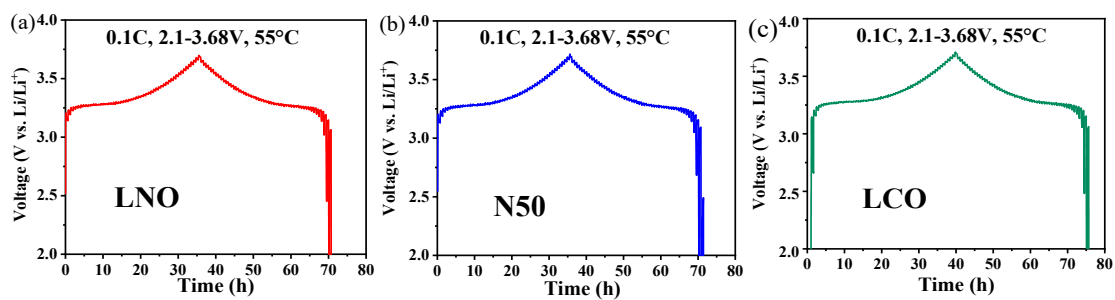

**Fig. S7** Voltage-time patterns for the ASSLB assembled with (a) LNO, (b) N50 and (c) LCO cathode materials at a current density of 0.1C using the GITT test method.

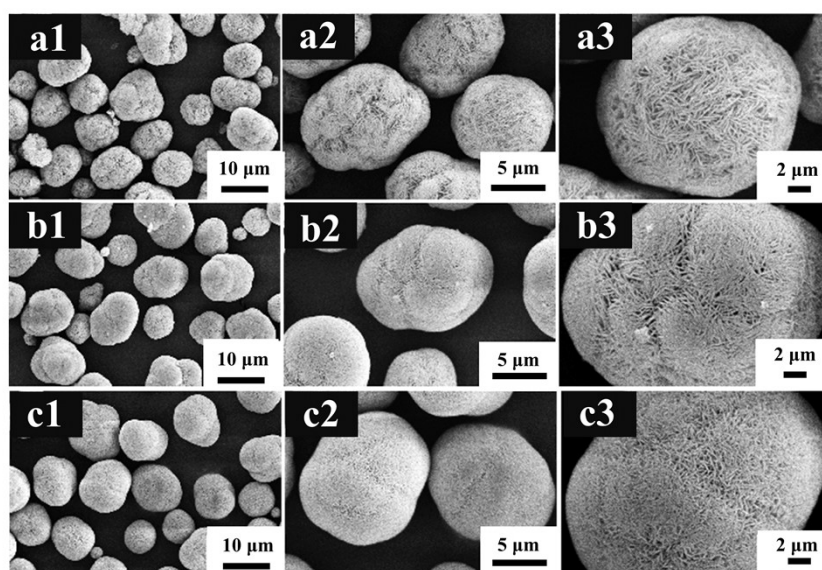

**Fig. S8** SEM images of precursors of (a1-c3) NCM442, NCM622 and NCM811.

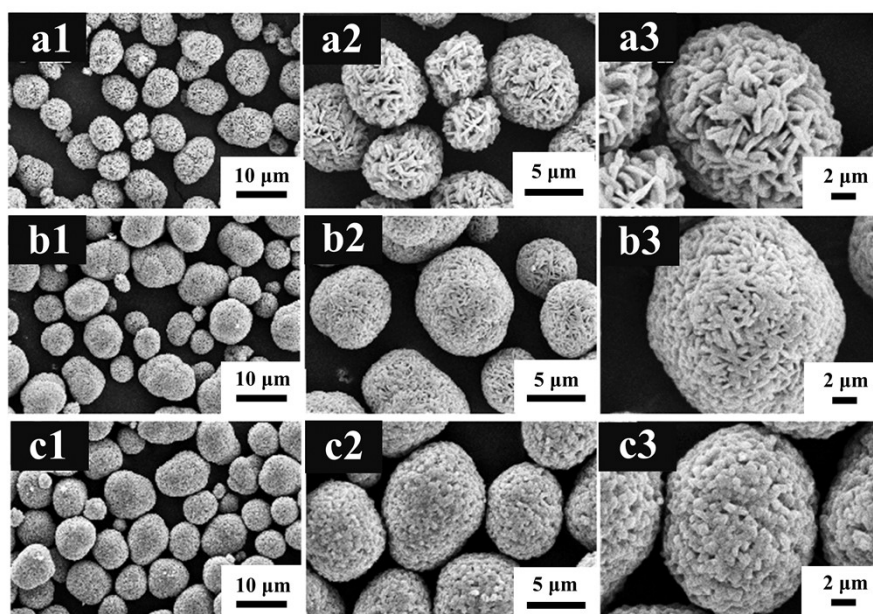

**Fig. S9** SEM images of (a1-c3) NCM442, NCM622 and NCM811.

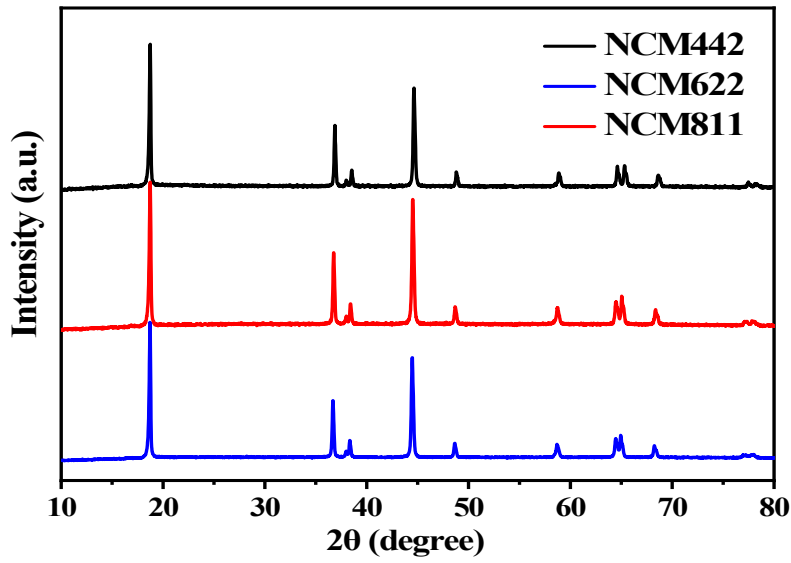

Fig. S10 XRD patterns of NCM442, NCM622 and NCM811.

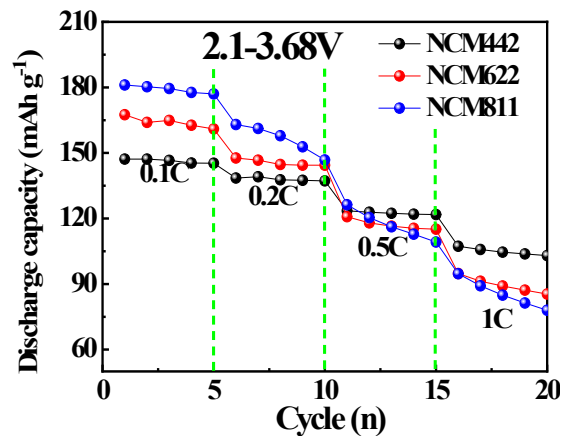

Fig. 11 Rate performance of  $\text{LiNi}_x\text{Co}_y\text{Mn}_{1-x-y}\text{O}_2$  cathodes in ASSLB.

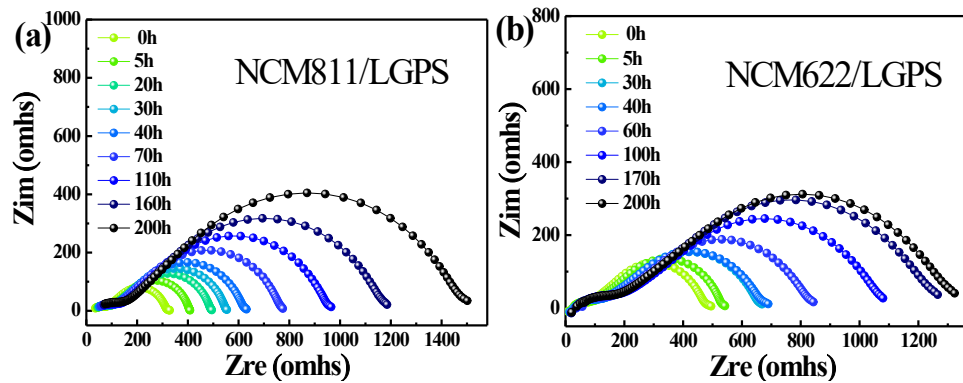

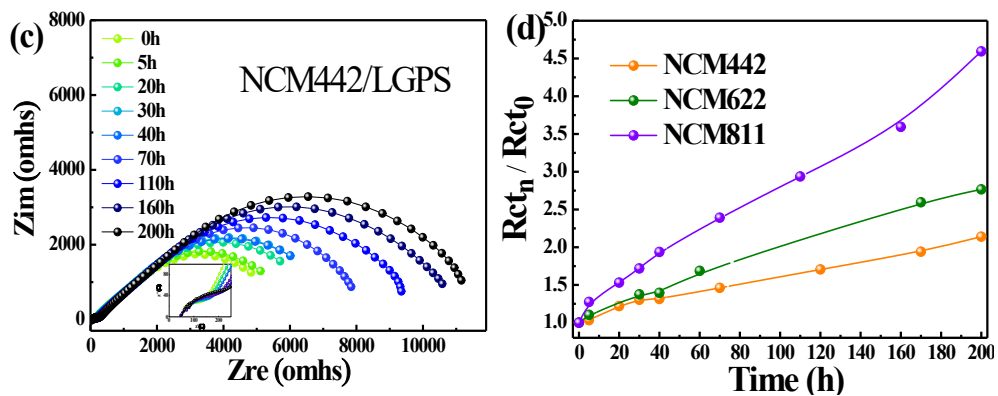

**Fig. S12** (a-c) Electrochemical impedance spectroscopy and (d) impedance increase comparison of  $\text{LiNi}_x\text{Co}_y\text{Mn}_{1-x-y}\text{O}_2/\text{LGPS}$  mixture with standing time.

**Table S1** Particle size analysis of  $\text{Ni}_x\text{Co}_{1-x}(\text{OH})_2$  precursors.

| Precursors                                      | $D_{10}$ ( $\mu\text{m}$ ) | $D_{50}$ ( $\mu\text{m}$ ) | $D_{90}$ ( $\mu\text{m}$ ) |
|-------------------------------------------------|----------------------------|----------------------------|----------------------------|
| $\text{Ni}(\text{OH})_2$                        | 5.25                       | 8.23                       | 10.88                      |
| $\text{Ni}_{0.75}\text{Co}_{0.25}(\text{OH})_2$ | 3.45                       | 6.5                        | 9.73                       |
| $\text{Ni}_{0.5}\text{Co}_{0.5}(\text{OH})_2$   | 4.76                       | 7.8                        | 10.68                      |
| $\text{Ni}_{0.25}\text{Co}_{0.75}(\text{OH})_2$ | 5.75                       | 8.37                       | 10.64                      |

**Table S2** Transition metal element content of  $\text{Ni}_x\text{Co}_{1-x}(\text{OH})_2$  precursors.

| Precursors                                      | Designed atomic ratio (%) |      | Measured atomic ratio (%) |       |
|-------------------------------------------------|---------------------------|------|---------------------------|-------|
|                                                 | Ni                        | Co   | Ni                        | Co    |
| $\text{Ni}_{0.75}\text{Co}_{0.25}(\text{OH})_2$ | 0.75                      | 0.25 | 0.744                     | 0.256 |
| $\text{Ni}_{0.5}\text{Co}_{0.5}(\text{OH})_2$   | 0.5                       | 0.5  | 0.503                     | 0.497 |
| $\text{Ni}_{0.25}\text{Co}_{0.75}(\text{OH})_2$ | 0.25                      | 0.75 | 0.246                     | 0.754 |

**Table S3** Lattice parameters of  $\text{LiNi}_x\text{Co}_{1-x}\text{O}_2$ .

| Samples | Lattice parameters |                   | c/a    | $I_{(003)/(104)}$ |
|---------|--------------------|-------------------|--------|-------------------|
|         | a[ $\text{\AA}$ ]  | c[ $\text{\AA}$ ] |        |                   |
| LNO     | 2.8847             | 14.2217           | 4.9301 | 1.001             |
| N75     | 2.815              | 14.045            | 4.9893 | 1.20              |
| N50     | 2.815              | 14.046            | 4.9896 | 1.23              |
| N25     | 2.816              | 14.048            | 4.9886 | 1.42              |
| LCO     | 2.8156             | 14.0564           | 4.9994 | 1.304             |

**Table S4** Initial charge/discharge capacities and coulombic efficiencies of  $\text{LiNi}_x\text{Co}_{1-x}\text{O}_2$  materials in liquid coin-cells.

| Electrode materials | Initial capacity ( $\text{mAh g}^{-1}$ ) |           | Coulomb efficiency (%) |
|---------------------|------------------------------------------|-----------|------------------------|
|                     | Charge                                   | Discharge |                        |
| LNO                 | 249.9                                    | 194.9     | 78.0                   |
| N75                 | 216.4                                    | 175.9     | 81.3                   |
| N50                 | 179.1                                    | 170.0     | 94.9                   |
| N25                 | 168.6                                    | 153.4     | 91.0                   |
| LCO                 | 159.3                                    | 145.6     | 91.4                   |

**Table S5** Cycle performance of  $\text{LiNi}_x\text{Co}_{1-x}\text{O}_2$  materials in liquid coin-cells.

| Electrode materials | 6th Discharge capacity (mAh g <sup>-1</sup> ) | 100th Discharge capacity (mAh g <sup>-1</sup> ) | Capacity retention (%) |
|---------------------|-----------------------------------------------|-------------------------------------------------|------------------------|
| LNO                 | 164.2                                         | 124.3                                           | 78.0                   |
| N75                 | 172.7                                         | 127.6                                           | 73.8                   |
| N50                 | 160.3                                         | 129.8                                           | 80.9                   |
| N25                 | 151.7                                         | 133.3                                           | 87.8                   |
| LCO                 | 155.9                                         | 137.2                                           | 88.0                   |

**Table S6** Initial charge/discharge capacities and coulombic efficiencies of LiNi<sub>x</sub>Co<sub>1-x</sub>O<sub>2</sub> materials in ASSLB

| Electrode materials | Initial capacity (mAh g <sup>-1</sup> ) |           | Coulomb efficiency (%) |
|---------------------|-----------------------------------------|-----------|------------------------|
|                     | Charge                                  | Discharge |                        |
| LNO                 | 169.9                                   | 115.4     | 67.9                   |
| N75                 | 216                                     | 181.5     | 84.0                   |
| N50                 | 186.6                                   | 165.8     | 88.8                   |
| N25                 | 169.4                                   | 150.3     | 88.7                   |
| LCO                 | 160.8                                   | 147       | 91.4                   |

**Table S7** Cycle performance and capacity retention of LiNi<sub>x</sub>Co<sub>1-x</sub>O<sub>2</sub> materials in ASSLB

| Electrode materials | 6th discharge capacity (mAh g <sup>-1</sup> ) | 100th discharge capacity (mAh g <sup>-1</sup> ) | Capacity retention (%) |
|---------------------|-----------------------------------------------|-------------------------------------------------|------------------------|
| LNO                 | 107.7                                         | 55                                              | 51.0                   |
| N75                 | 181.6                                         | 95.1                                            | 52.3                   |
| N50                 | 153                                           | 119.4                                           | 78.0                   |
| N25                 | 144.1                                         | 122.4                                           | 84.9                   |
| LCO                 | 144.8                                         | 122                                             | 84.2                   |

**Table S8** The fitted EIS values of cycled ASSLB.

| Electrode materials | Cycle numbers | Rs    | Rf    | Rct2  |
|---------------------|---------------|-------|-------|-------|
| LNO                 | 1             | 24.49 | 15.41 | 146.4 |
|                     | 100           | 25.91 | 11.51 | 648.5 |
| N75                 | 1             | 30.88 | 9.08  | 24.99 |
|                     | 100           | 27.86 | 12.94 | 104.3 |
| N50                 | 1             | 42.43 | 11.89 | 19.45 |
|                     | 100           | 40.87 | 10.42 | 54.87 |
| N25                 | 1             | 22.61 | 11.18 | 48.92 |
|                     | 100           | 25.52 | 11.51 | 78.36 |
| LCO                 | 1             | 27.01 | 14.89 | 10.58 |
|                     | 100           | 27.59 | 13.37 | 20.85 |
